# Supplementary material for: Alternative splicing is a driving force that tunes metabolic adaptations to virulence traits in the dermatophyte Trichophyton rubrum
Source: Frontiers journal article supplement (doi:10.3389/fcimb.2025.1645525), 2025-09-10
Supplement: Data_Sheet_1.pdf [file Data_Sheet_1.pdf]

## Supplementary Material

### Supplementary Figures and Table

**Supplementary Table 1** List of primers of RT-qPCR used in this work.

| Gene/isoform                               | Sequence                                                | Concentration | Reference         |
|--------------------------------------------|---------------------------------------------------------|---------------|-------------------|
| <i>rpb2</i>                                | F: TGCAGGAGGTTTGATGAAGA<br>R: GCTGGGAGGTACTGTTTGATCAA   | 300 nM        | Jacob et al, 2012 |
| <i>gapdh</i>                               | F: GCGTGACCCAGCGATGTAGT<br>R: CGGTGGACTCGACGATGTAGT     | 200 nM        | Jacob et al, 2012 |
| <i>pacC</i><br>Intron-2 retention          | F: TTCTATTGTGGTGTGCTCA<br>R: TAATACTGTGGTGGAGGGT        | 100 nM        | This work         |
| <i>pacC</i><br>Total expression.           | F: ACTCCAGAGACTACGTGACTATG<br>R: AGTCTTCCTGCTTGTCTTCG   | 200 nM        | This work         |
| <i>con7</i><br>Intron-3 retention          | F: TGCTGTCTCTCTCCTATCTAC<br>R: CTGCACACTCCACCAAGAT      | 300 nM        | This work         |
| <i>con7</i><br>Total expression.           | F: CTCCTGGTGGTTTGGTCTAT<br>R: GCCCTGACCATAAGGAGAATG     | 100 nM        | This work         |
| <i>apl</i><br>Intron-1 retention           | F: CGTAAGTGTCTTCTGAGCCTT<br>R: GAGCTTTCCGTTTCTATGACC    | 300 nM        | This work         |
| <i>apl</i><br>Total expression.            | F: CCTCCCTAAGGACGATCA<br>R: CCAGAACAAATCAGGTGGA         | 100 nM        | This work         |
| TERG_06830 <i>c6</i><br>Intron-2 retention | F: CCCAGACACAGTCTCATCATTA<br>R: GTGGGAAGAGGAACGTCATAC   | 100 nM        | This work         |
| TERG_06830 <i>c6</i><br>Total expression   | F: CTGAGATTCTTGGCGATCTTCT<br>R: GTCTTCCCACCGATCCAAAT    | 300 nM        | This work         |
| TERG_02870<br><i>prp22</i>                 | F: AAAGTCATCATCGTCTCTAACCAAC<br>R: GGATCATAGGCTCGCAGTTT | 100 nM        | This work         |
| TERG_05157<br><i>prp43</i>                 | F: CGTACTCGACCTGGGAAATG<br>R: ATCCAGAACCGTGGAAGATAAG    | 200 nM        | This work         |
| TERG_06768<br><i>prp28</i>                 | F: GCCCAGCAGATCGAAATA<br>R: GCTCCGTTGCGTAGATTA          | 200 nM        | This work         |
| TERG_03261<br><i>prp1</i>                  | F: AGAGAACATCCGCCTCAA<br>R: GCTTCGATCCAGAGTCTAGT        | 100 nM        | This work         |

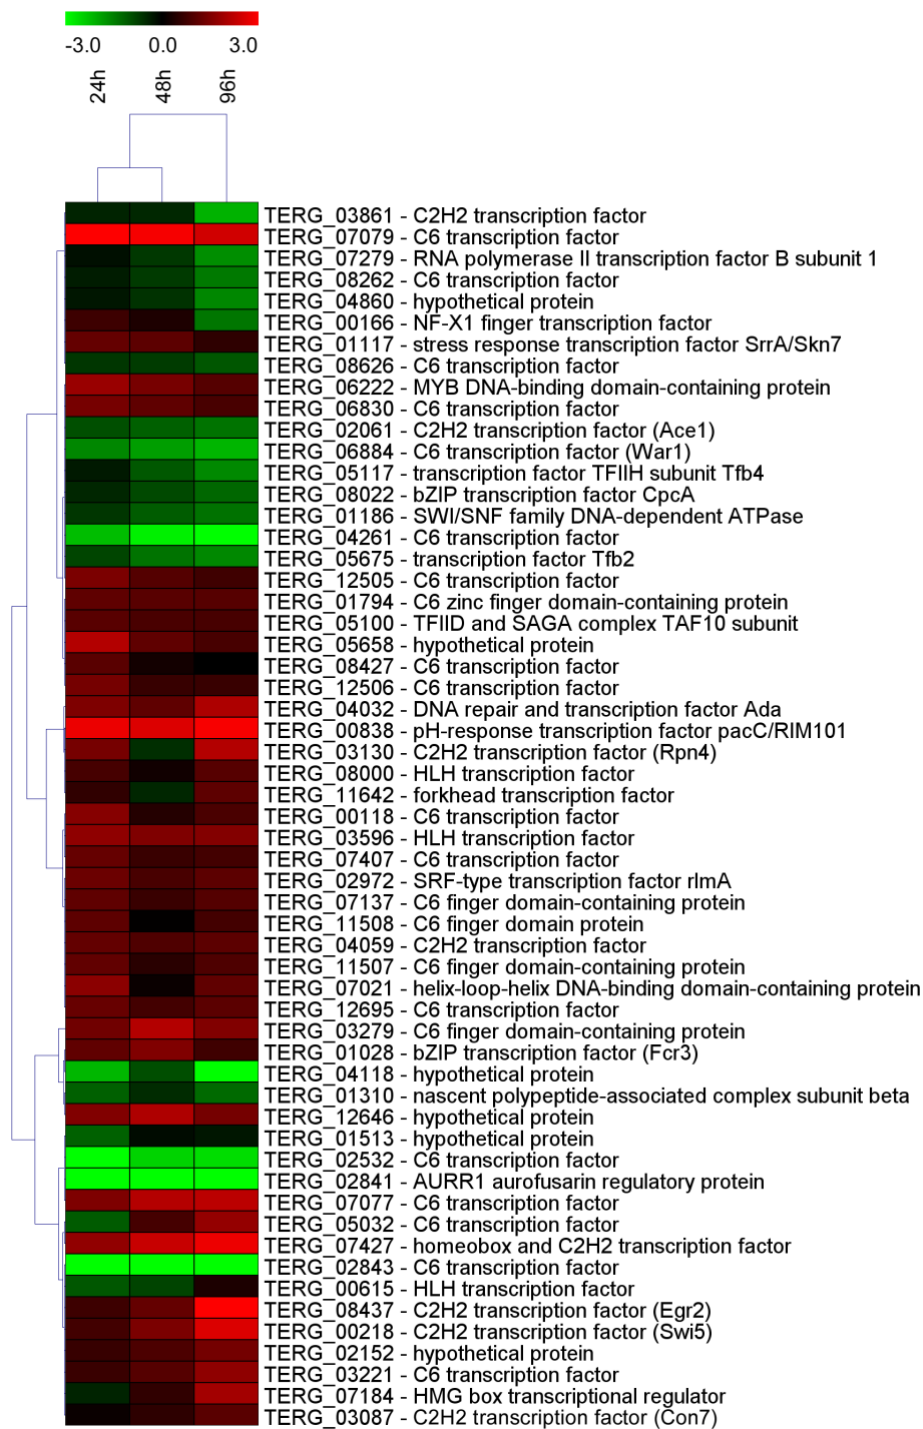

### Supplementary Figure 1

Heatmap and hierarchical clustering of gene expression data. Gene encoding transcription factors of *Trichophyton rubrum* that are differentially expressed in response to keratin (24, 48, and 96 h of culture). The color scale from green to red indicates the lowest to the highest gene expression.

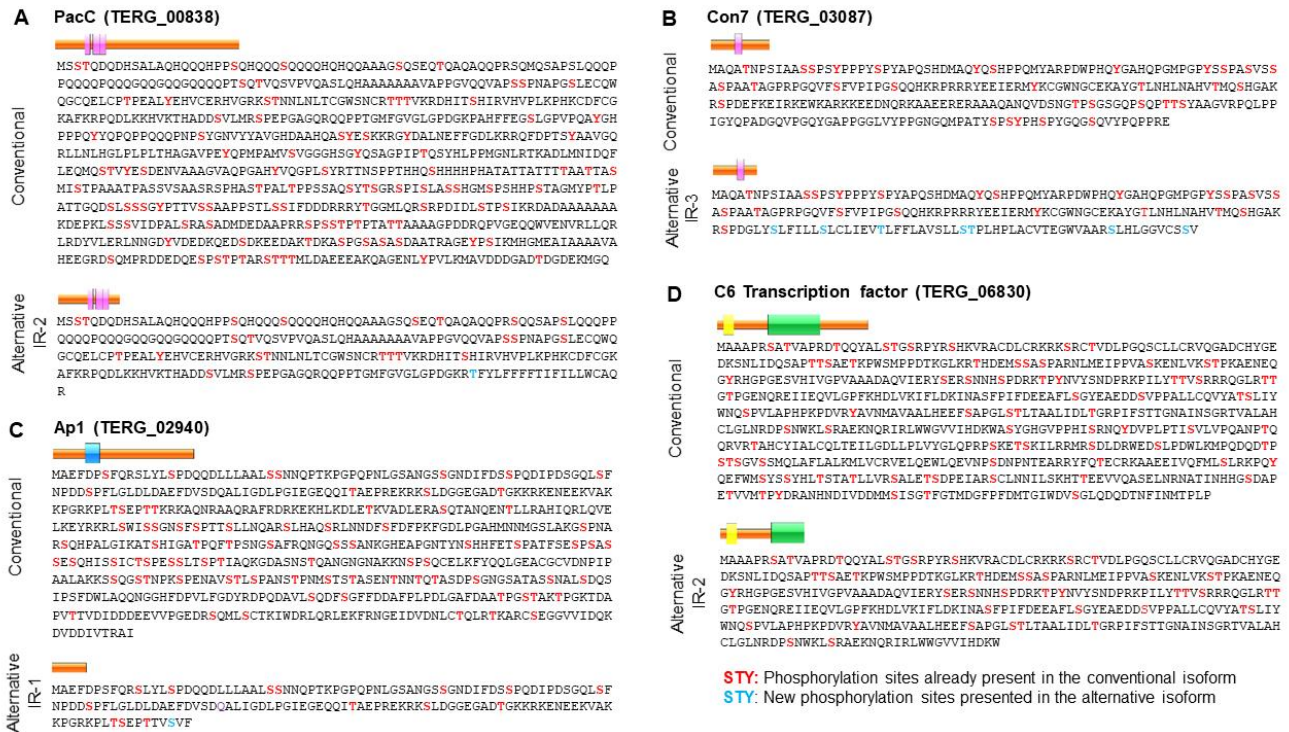

## Supplementary Figure 2

Prediction of phosphorylation sites in protein isoforms of transcription factors in *Trichophyton rubrum*. The amino acid sequences of different transcription factor isoforms are presented. The amino acids highlighted in color (red and blue) are putative phosphorylation residues on serine (S), threonine (T), and tyrosine (Y). The residues in red are those already found in conventional isoforms, whereas those in blue are new residues presented in alternative isoforms.

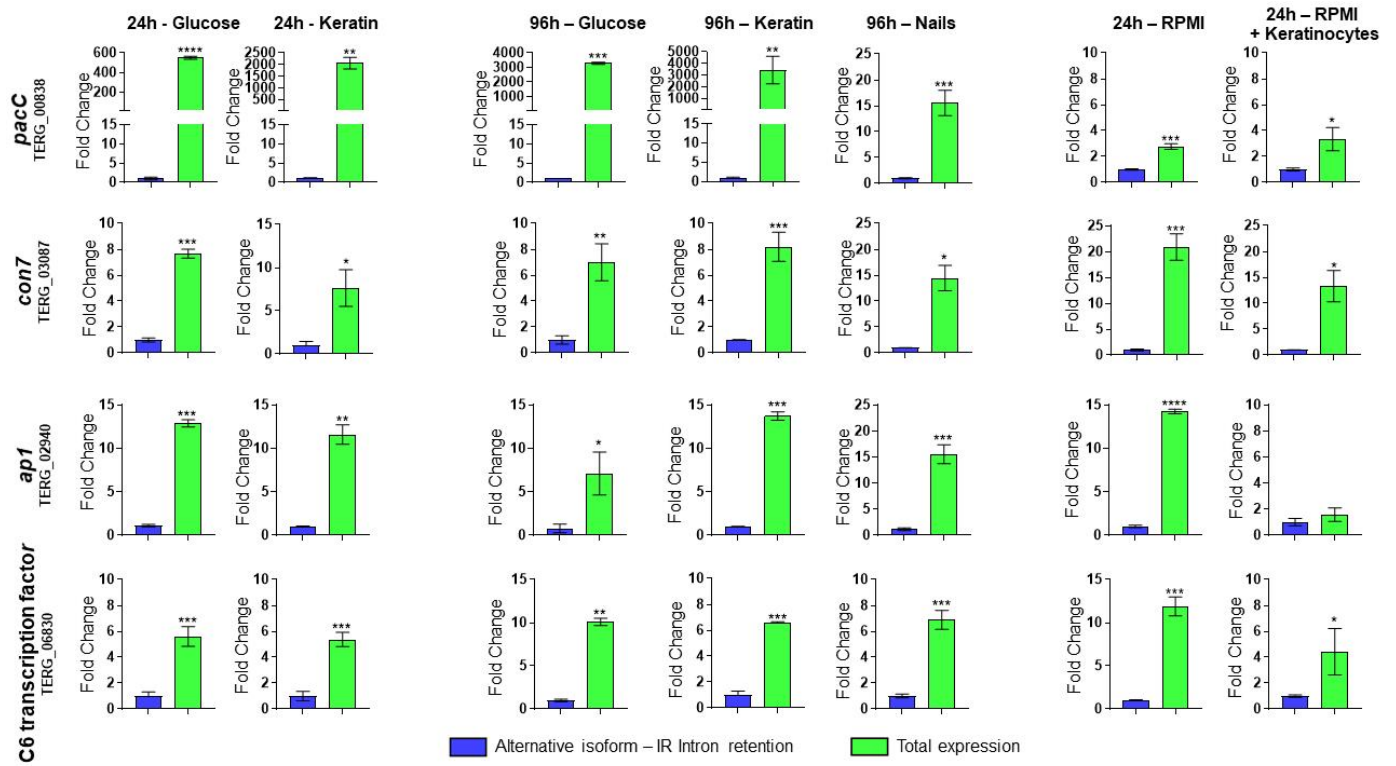

### Supplementary Figure 3

Direct comparison between total gene expression and intron-retaining (IR) isoforms of transcription factor genes in *Trichophyton rubrum* under distinct experimental conditions. Total gene expression (green bars) was compared to IR isoforms (blue bars) for *pacC*, *con7*, *ap1*, and *c6* transcripts. IR was used as the paired reference for each condition. Statistical analysis was performed using *t*-test. \* $p < 0.05$ , \*\* $p < 0.01$ , \*\*\* $p < 0.001$ .

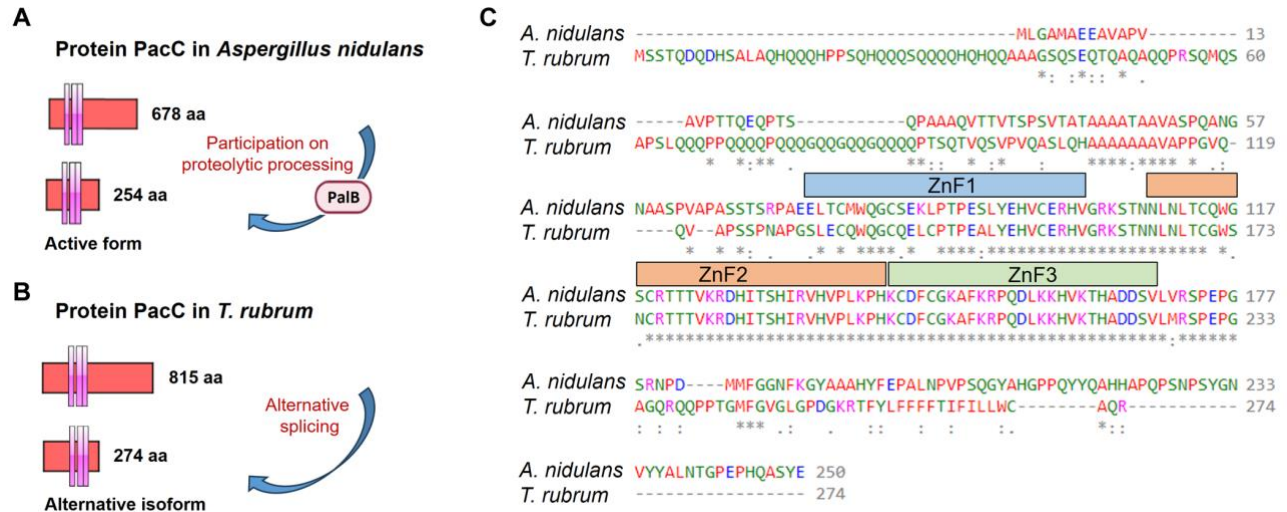

### Supplementary Figure 4

Schematization and alignment of PacC protein resulting from proteolytic processing and alternative splicing (AS) in *Aspergillus nidulans* and *Trichophyton rubrum*, respectively. **(A)** Activation of PacC protein in *A. nidulans* following proteolytic processing is mediated by PalB, resulting in a minor protein with three zinc-finger domains. **(B)** Putative activation of PacC protein resulting from AS (IR-2 in *T. rubrum*). The two processes generate similar proteins in terms of size, conservation, and number of DNA-binding domains (zinc finger domain). **(C)** Alignment of PacC proteins originated from these two molecular processes. The blue, orange, and green rectangles represent the location of zinc fingers 1, 2, and 3 DNA-binding domains, respectively.
